# Supplementary material for: Gastro-Resistant Microparticles Produced by Spray-Drying as Controlled Release Systems for Liposoluble Vitamins
Source: Pharmaceutics. 2022 Jul 15;14(7):1480. doi: 10.3390/pharmaceutics14071480 (PMC9319434; doi:10.3390/pharmaceutics14071480)
Supplement: Supplementary file 1 [file pharmaceutics-14-01480-s001.zip › pharmaceutics-1767757-supplementary.pdf]

# Gastro-resistant microparticles produced by spray-drying as controlled release systems for liposoluble vitamins

Francesca Terracina<sup>1</sup>, Roberto Caruana<sup>2</sup>, Francesco Montalbano<sup>2</sup>, Mariano Licciardi<sup>1\*</sup>

<sup>1</sup> Dipartimento di Scienze e Tecnologie Biologiche Chimiche e Farmaceutiche (STEBICEF), Università degli Studi di Palermo, 90123 Palermo, Italy.

<sup>2</sup> Technology Scientific S.r.l., Viale delle Scienze, Edificio 18, 90128, Palermo, Italy

\*Corresponding author: mariano.licciardi@unipa.it; Dipartimento di Scienze e Tecnologie Biologiche Chimiche e Farmaceutiche (STEBICEF), Università degli Studi di Palermo, 90123 Palermo, Italy.

## Supplementary Information

**Table S1.** Summary table of the formulation compositions of all the batches subjected to the spray drying process.

| Batches | Formulations' composition                    |
|---------|----------------------------------------------|
| A1      | 2 g Arabic gum                               |
|         | 2.5 g Mannitol                               |
|         | 0.25 g Soy lecithin                          |
|         | 0.5 g Retinyl palmitate (in 5 ml of ethanol) |
|         | 0.6 g Eudraguard Biotic (2 ml 30% v/w)       |
|         | 45 ml Distilled water                        |
| B1      | 2 g Arabic gum                               |
|         | 2.5 g Mannitol                               |
|         | 0.25 g Soy lecithin                          |
|         | 0.5 g $\beta$ -carotene(in 5 ml of ethanol)  |
|         | 0.6 g Eudraguard Biotic (2 ml 30% v/w)       |
|         | 45 ml Distilled water                        |
| C1      | 2 g Arabic gum                               |
|         | 2.5 g Mannitol                               |
|         | 0.25 g Soy lecithin                          |
|         | 0.5 g Retinyl acetate (in 5 ml of ethanol)   |
|         | 0.6 g Eudraguard Biotic (2 ml 30% v/w)       |
|         | 45 ml Distilled water                        |

|           |                                                                                                                                                                                |
|-----------|--------------------------------------------------------------------------------------------------------------------------------------------------------------------------------|
| <b>D1</b> | 2 g Arabic gum<br>2.5 g Mannitol<br>0.25 g Soy lecithin<br>0.1 g Cholecalciferol (in 5 ml of ethanol)<br>0.6 g Eudraguard Biotic (2 ml 30% v/w)<br>45 ml Distilled water       |
| <b>E1</b> | 2 g Arabic gum<br>2.5 g Mannitol<br>0.25 g Soy lecithin<br>0.25 g $\alpha$ -tocopherol (in 5 ml of ethanol)<br>0.6 g Eudraguard Biotic (2 ml 30% v/w)<br>45 ml Distilled water |
| <b>A2</b> | 2 g Arabic gum<br>2.5 g Mannitol<br>0.25 g Soy lecithin<br>0.5 g Retinyl palmitate (in 5 ml of ethanol)<br>0.25 g CAP<br>45 ml Distilled water                                 |
| <b>B2</b> | 2 g Arabic gum<br>2.5 g Mannitol<br>0.25 g Soy lecithin<br>0.5 g $\beta$ -carotene (in 5 ml of ethanol)<br>0.25 g CAP<br>45 ml Distilled water                                 |
| <b>C2</b> | 2 g Arabic gum<br>2.5 g Mannitol<br>0.25 g Soy lecithin<br>0.5 g Retinyl acetate (in 5 ml of ethanol)<br>0.25 g CAP<br>45 ml Distilled water                                   |
| <b>D2</b> | 2 g Arabic gum<br>2.5 g Mannitol<br>0.25 g Soy lecithin<br>0.1 g Cholecalciferol (in 5 ml of ethanol)<br>0.25 g CAP<br>45 ml Distilled water                                   |
| <b>E2</b> | 2 g Arabic gum<br>2.5 g Mannitol<br>0.25 g Soy lecithin<br>0.25 g $\alpha$ -tocopherol (in 5 ml of ethanol)<br>0.25 g CAP<br>45 ml Distilled water                             |
| <b>A3</b> | 2.5 g WPs<br>0.5 g Retinyl palmitate<br>50 ml Whole milk                                                                                                                       |
| <b>B3</b> | 2.5 g WPs<br>0.5 g $\beta$ -carotene<br>50 ml Whole milk                                                                                                                       |

|           |                                                              |
|-----------|--------------------------------------------------------------|
| <b>C3</b> | 2.5 g WPs<br>0.5 g Retinyl acetate<br>50 ml Whole milk       |
| <b>D3</b> | 2.5 g WPs<br>0.1 g Cholecalciferol<br>50 ml Whole milk       |
| <b>E3</b> | 2.5 g WPs<br>0.25 g $\alpha$ -tocopherol<br>50 ml Whole milk |

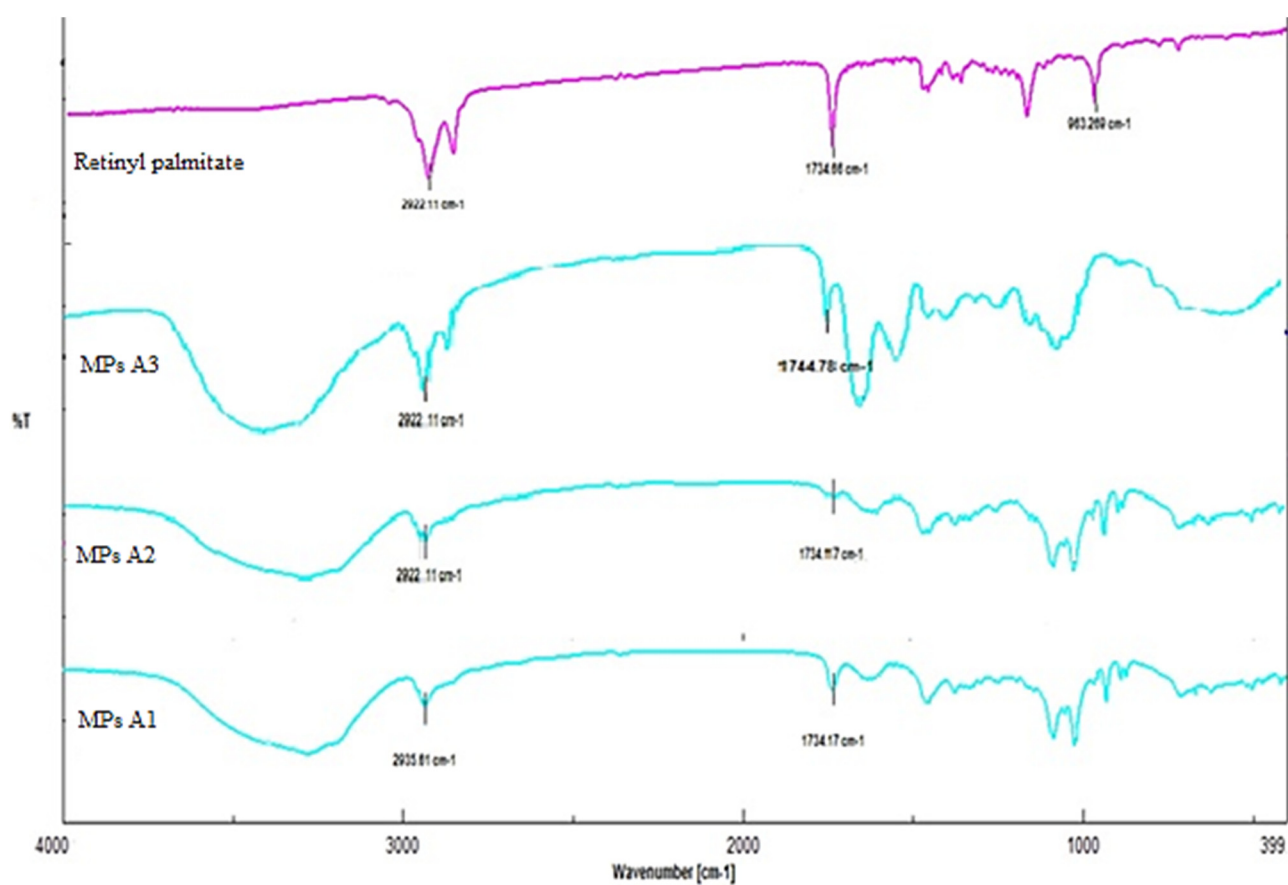

**Figure S1.** FTIR spectra of pure retinyl palmitate and MP formulations A1 (Eudraguard Biotic), A2 (CAP) and A3 (WPs).

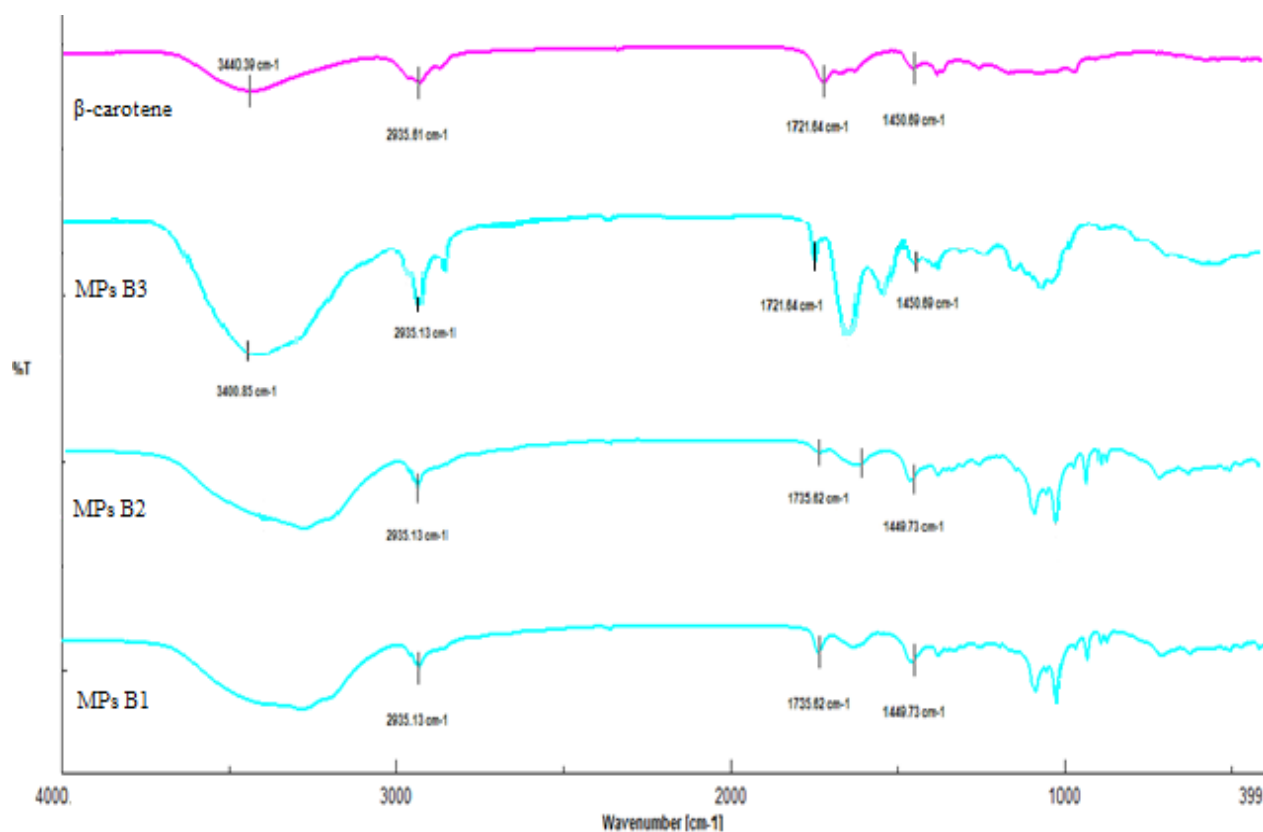

**Figure S2.** FTIR spectra of pure  $\beta$ -carotene and MP formulations B1 (Eudraguard Biotic), B2 (CAP) and B3 (WPs).

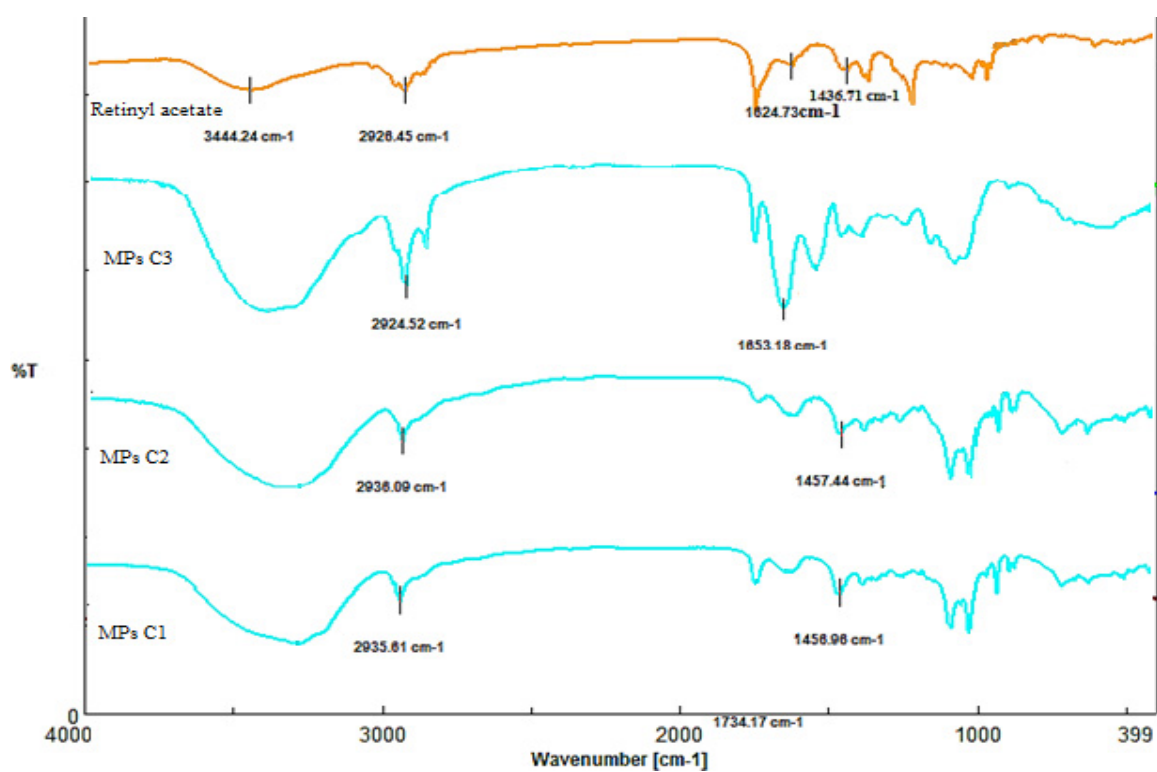

**Figure S3.** FTIR spectra of pure retinyl acetate and MP formulations C1 (Eudraguard Biotic), C2 (CAP) and C3 (WPs).

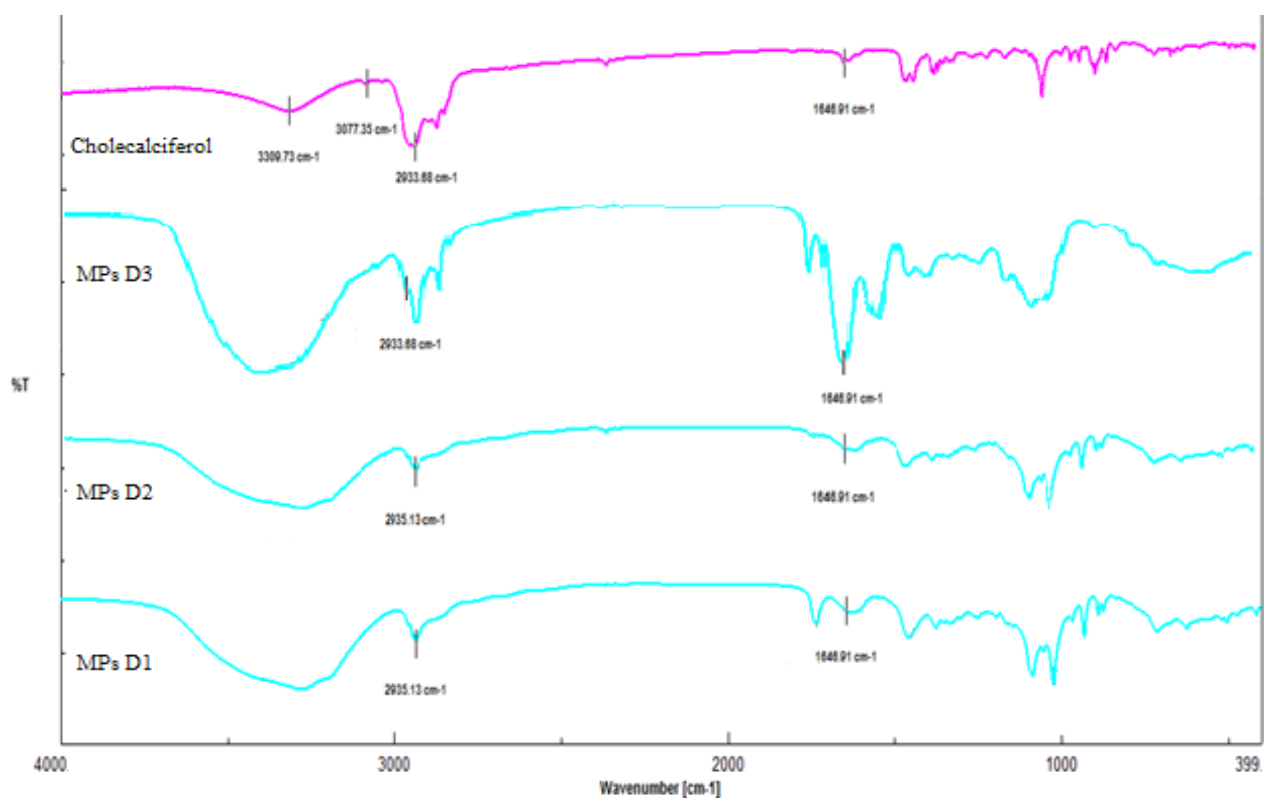

**Figure S4.** FTIR spectra of pure cholecalciferol and MP formulations D1 (Eudraguard Biotic), D2 (CAP) and D3 (WPs).

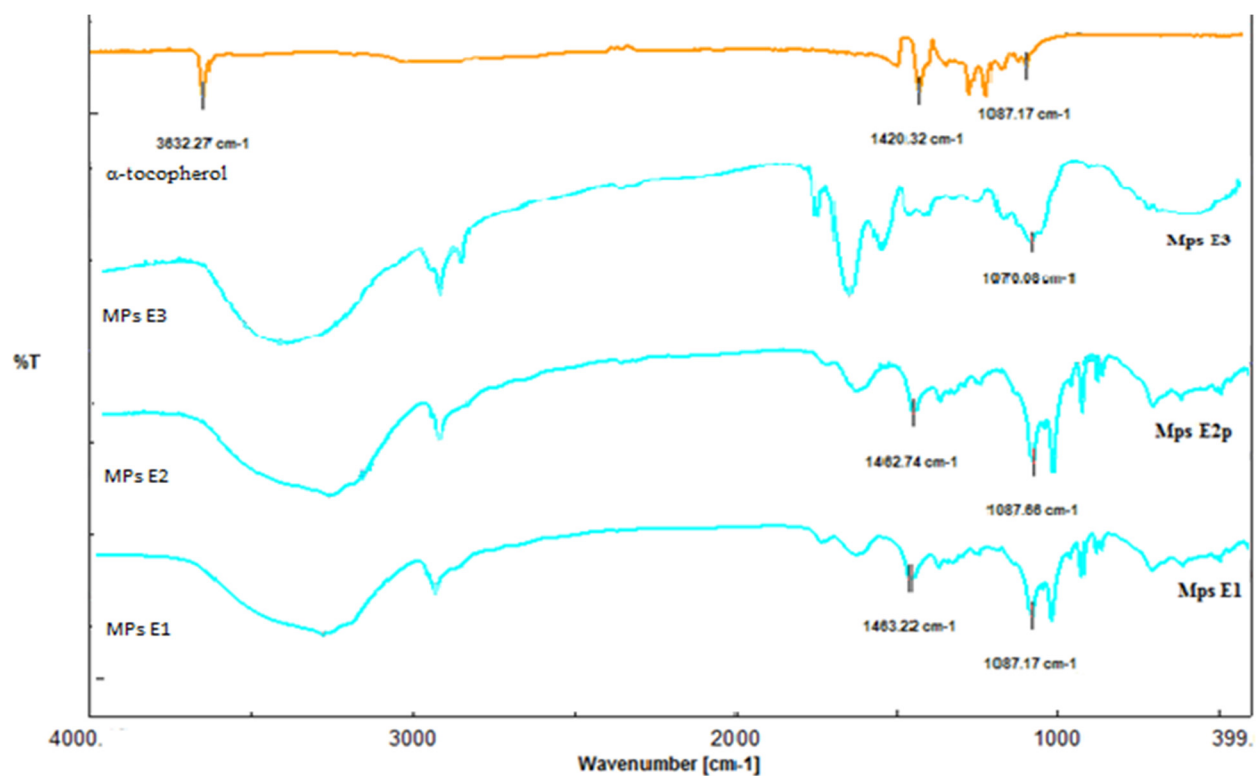

**Figure S5.** FTIR spectra of pure  $\alpha$ -tocopherol and MP formulations E1 (Eudraguard Biotic), E2 (CAP) and E3 (WPs).

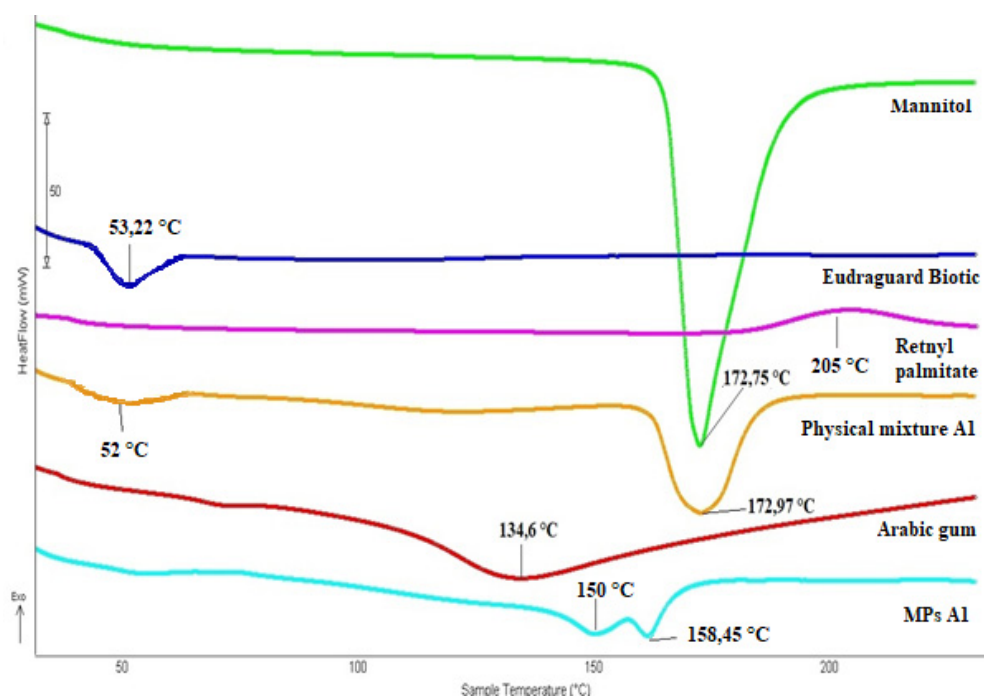

**Figure S6.** Comparison between the DSC graphs of Mannitol, Eudraguard Biotic, retinyl palmitate, the physical mixture of the compounds presents in the formulation A1 and microparticles (MPs A1).

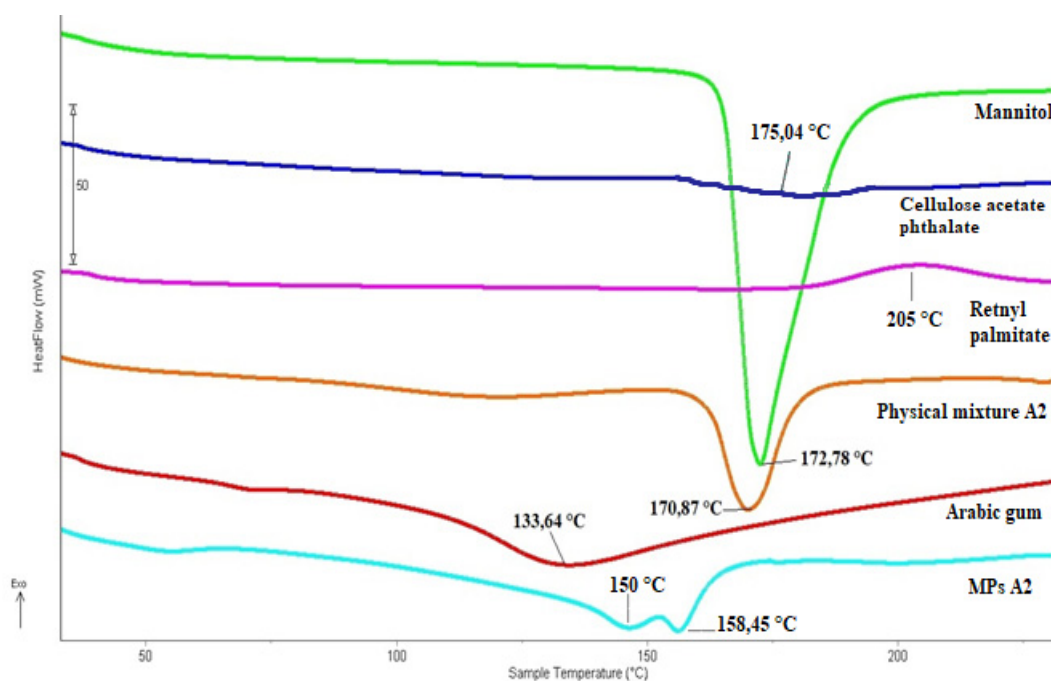

**Figure S7.** Comparison between the DSC graphs of Mannitol, CAP, retinyl palmitate, the physical mixture of the compounds presents in the formulation A2 and microparticles (MPs A2).

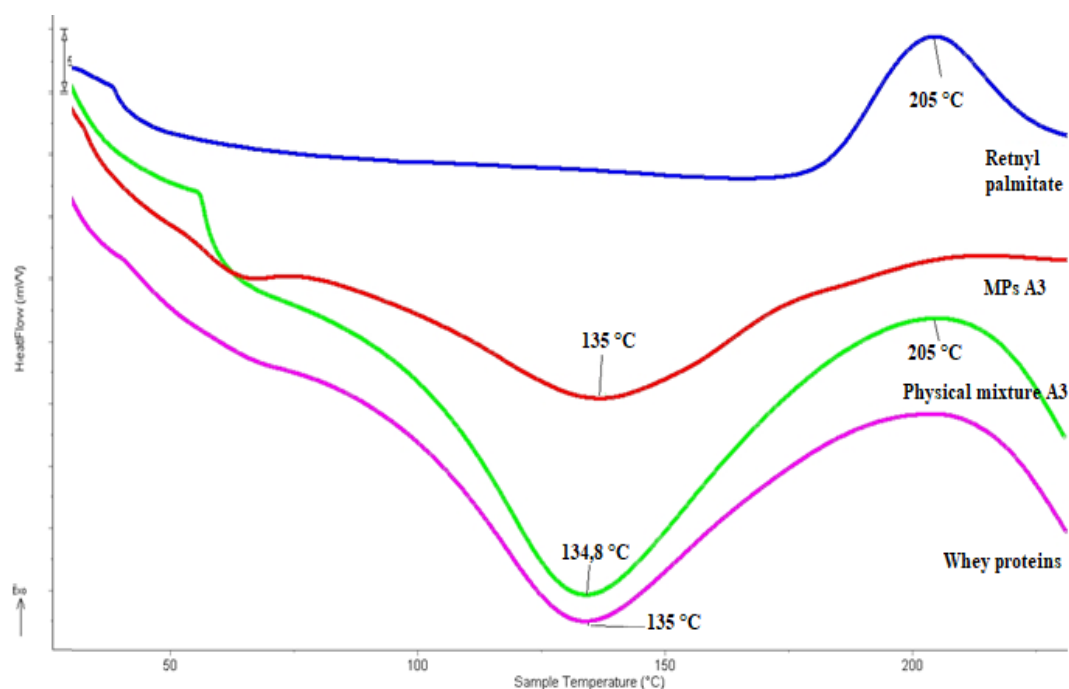

**Figure S8.** Comparison between the DSC graphs of WPs, retinyl palmitate, the physical mixture of the compounds presents in the formulation A3 and microparticles (MPs A3).

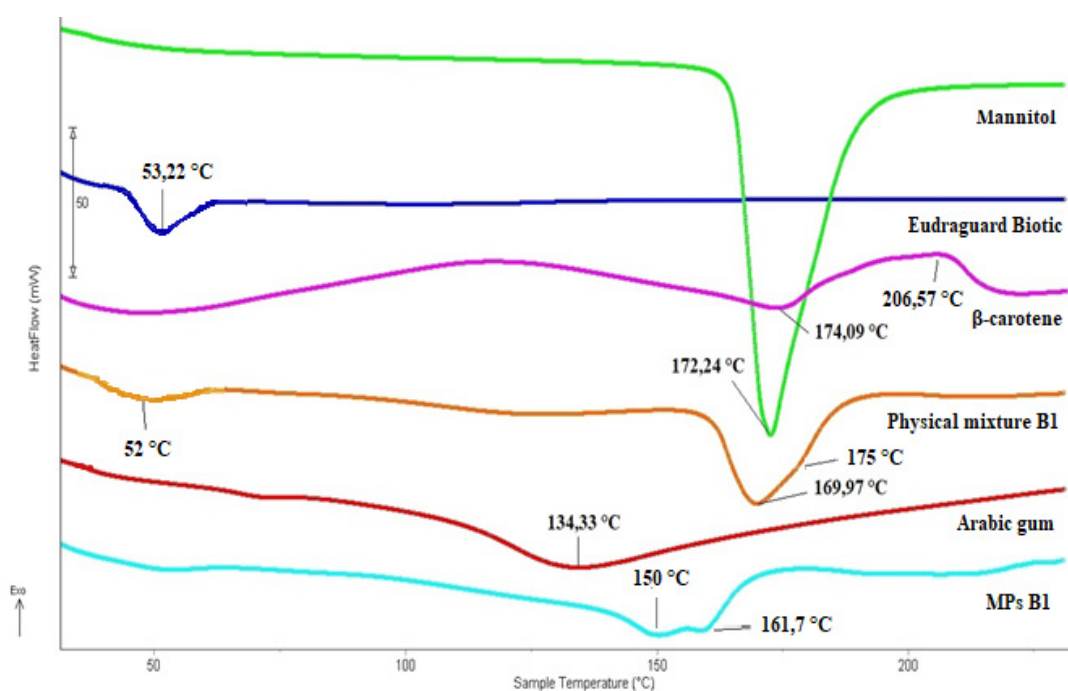

**Figure S9.** Comparison between the DSC graphs of mannitol, Eudraguard Biotic, β-carotene, the physical mixture of the compounds present in the formulation B1 and microparticles (MPs B1).

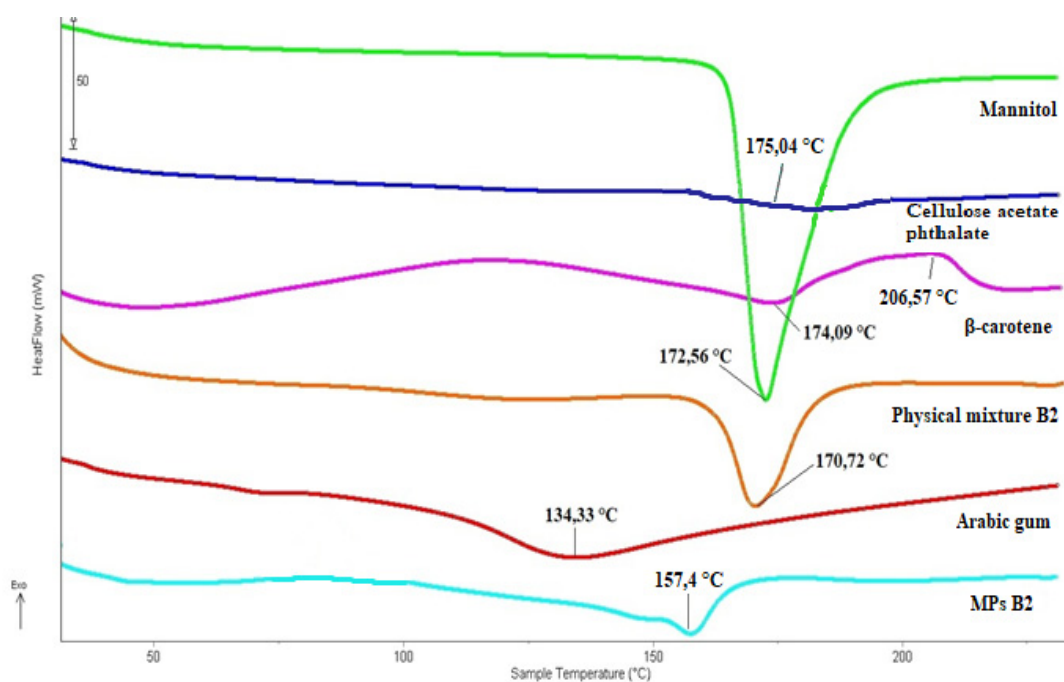

**Figure S10.** Comparison between the DSC graphs of mannitol, CAP,  $\beta$ -carotene, the physical mixture of the compounds presents in the formulation B2 and microparticles (MPs B2).

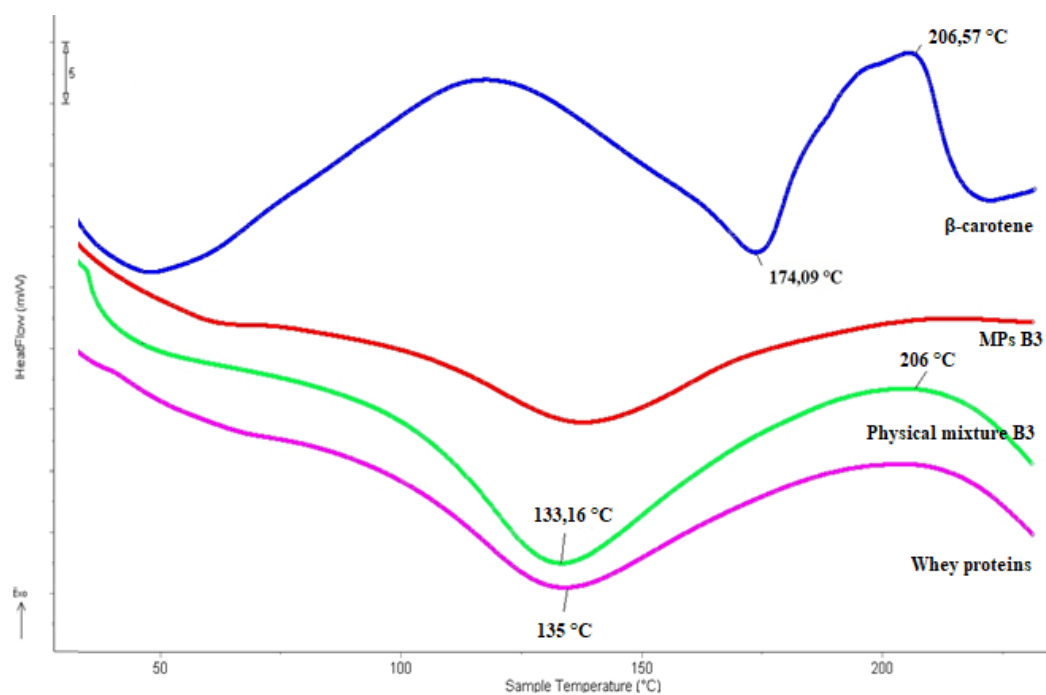

**Figure S11.** Comparison between the DSC graphs of WPs,  $\beta$ -carotene, the physical mixture of the compounds presents in the formulation B3 and microparticles (MPs B3).

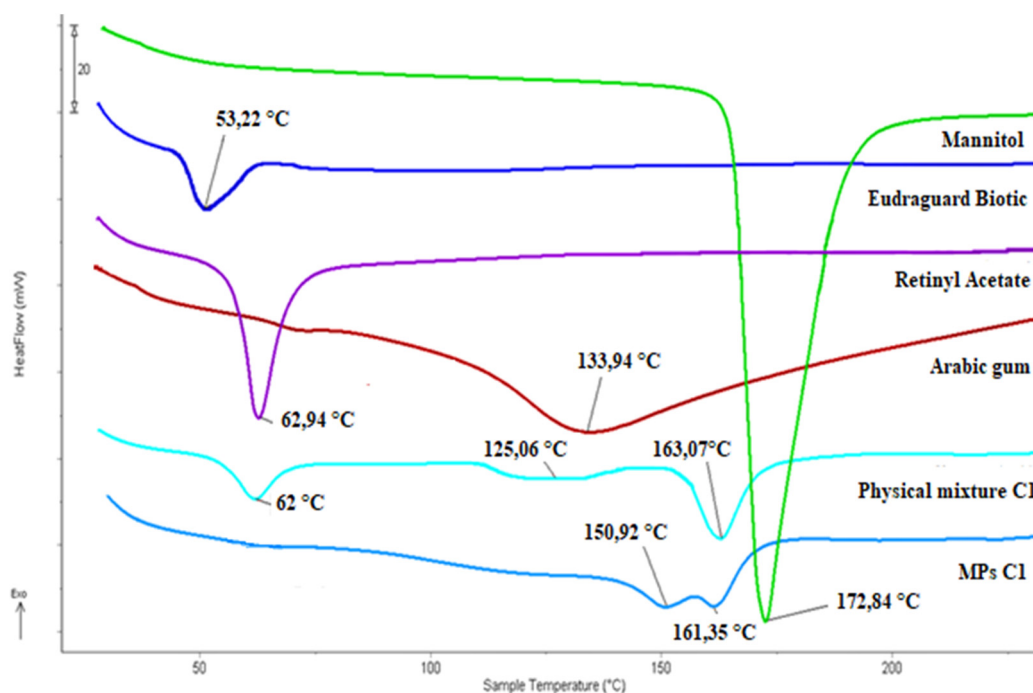

**Figure S12.** Comparison between the DSC graphs of mannitol, Eudraguard Biotic, retinyl acetate, the physical mixture of the compounds presents in the formulation C1 and microparticles (MPs C1).

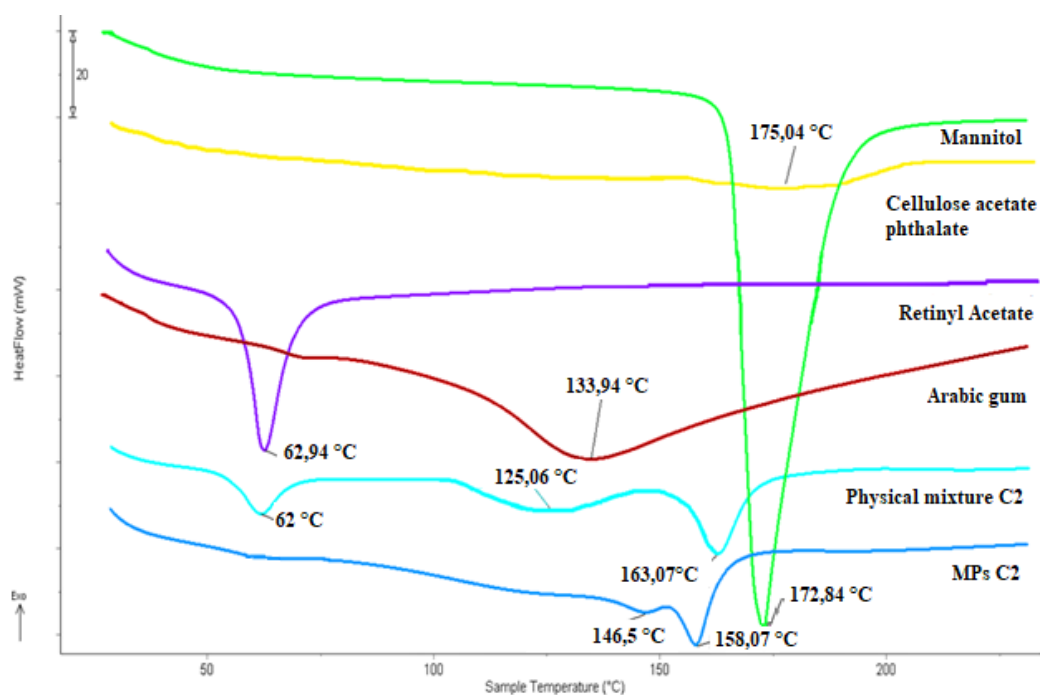

**Figure S13.** Comparison between the DSC graphs of mannitol, CAP, retinyl acetate, the physical mixture of the compounds presents in the formulation C2 and microparticles (MPs C2).

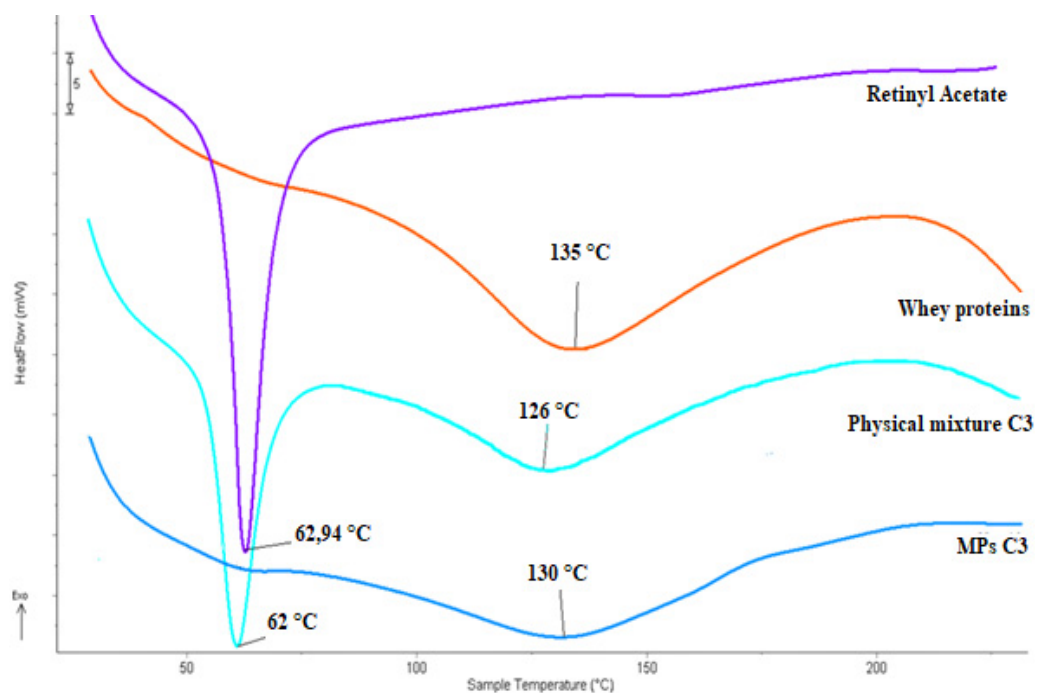

**Figure S14.** Comparison between the DSC graphs of WPs, retinyl acetate, the physical mixture of the compounds presents in the formulation C3 and microparticles (MPs C3).

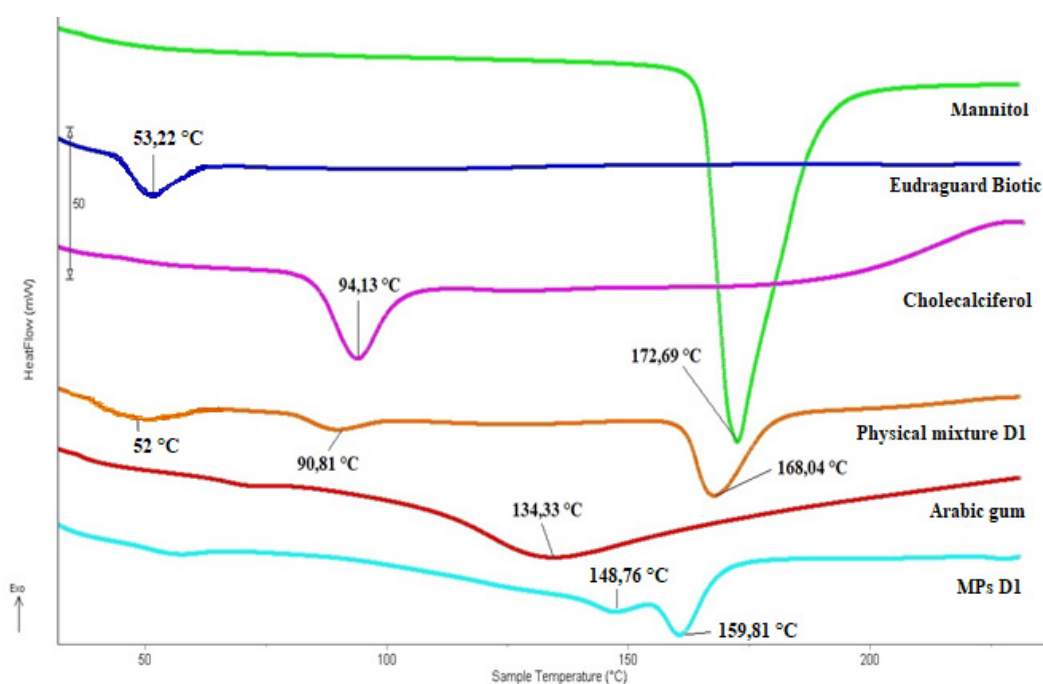

**Figure S15.** Comparison between the DSC graphs of mannitol, Eudraguard Biotic, cholecalciferol, the physical mixture of the compounds presents in the formulation D1 and microparticles (MPs D1).

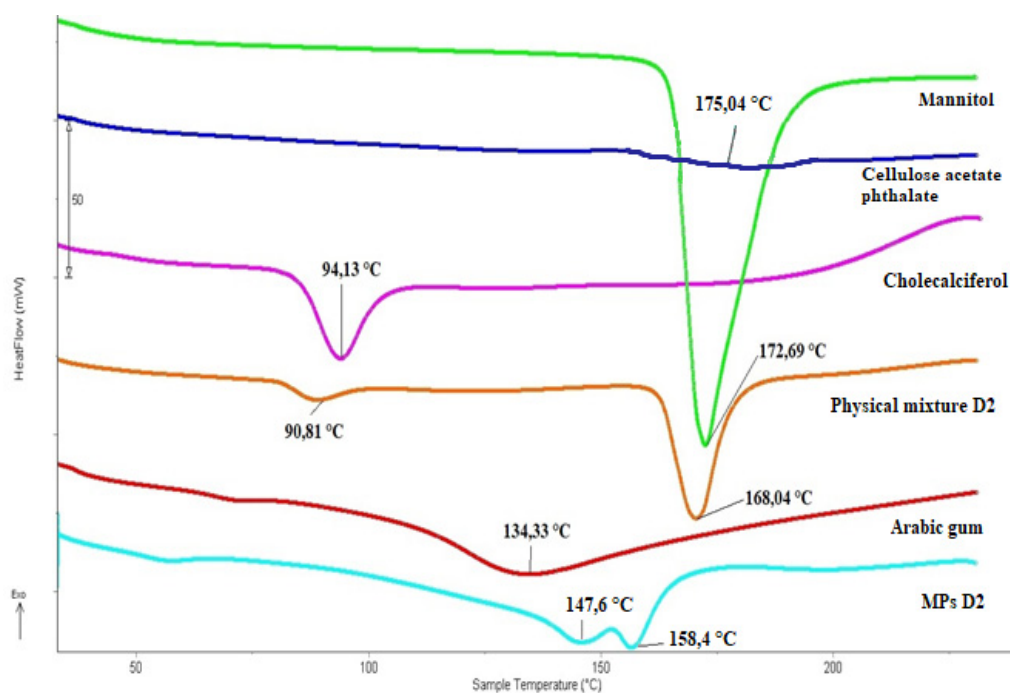

**Figure S16.** Comparison between the DSC graphs of mannitol, CAP, cholecalciferol, the physical mixture of the compounds presents in the formulation D2 and microparticles (MPs D2).

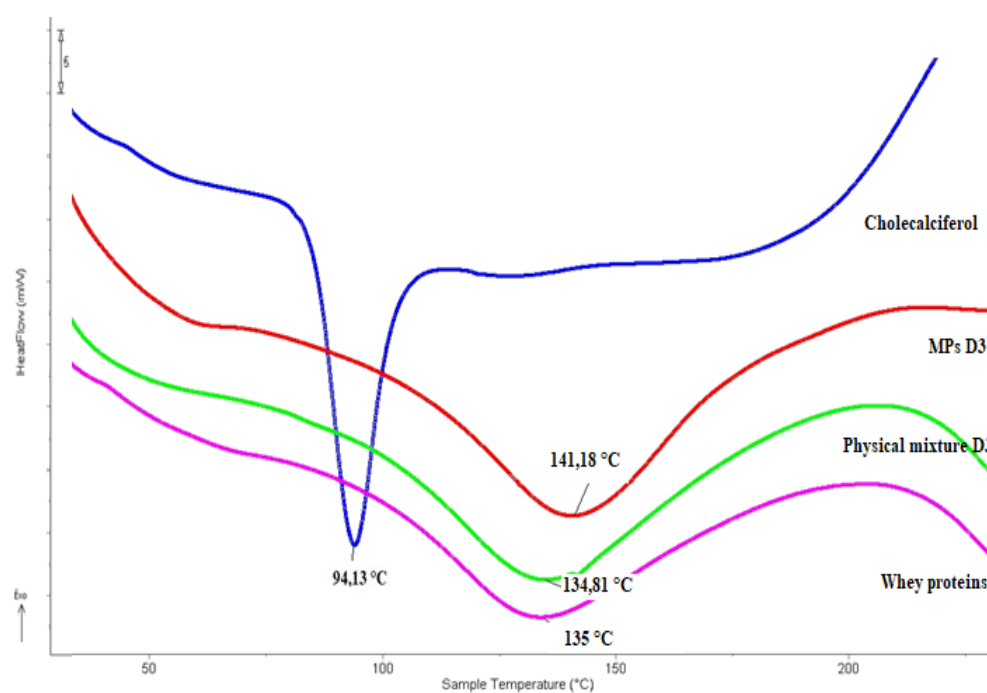

**Figure S17.** Comparison between the DSC graphs of WPs, cholecalciferol, the physical mixture of the compounds presents in the formulation D3 and microparticles (MPs D3).

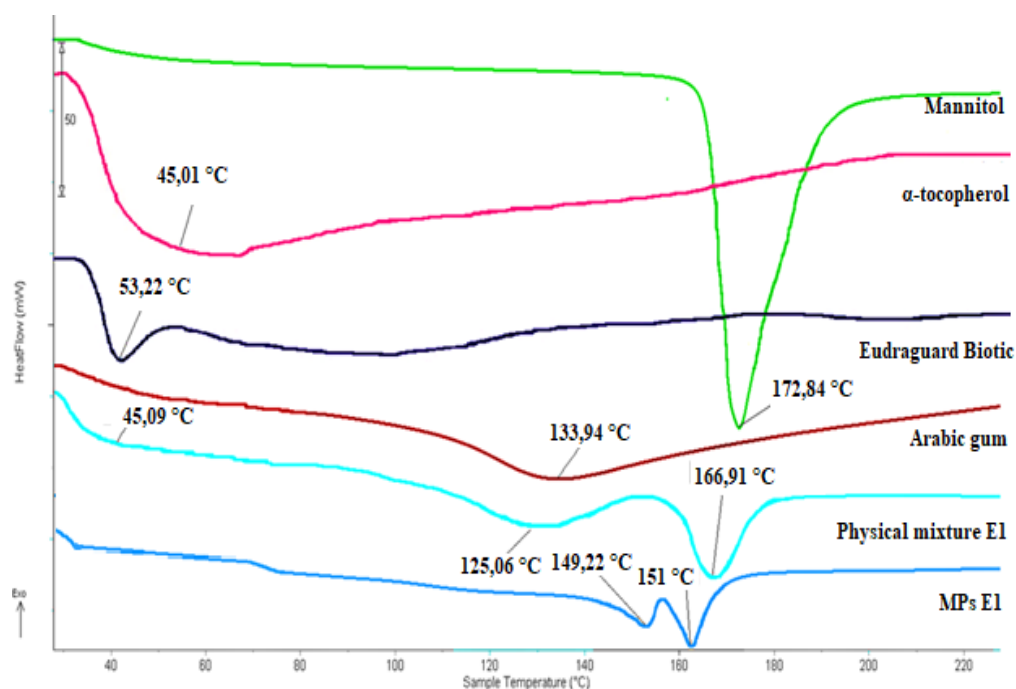

**Figure S18.** Comparison between the DSC graphs of mannitol, Eudraguard Biotic,  $\alpha$ -tocopherol, the physical mixture of the compounds presents in the formulation E1 and microparticles (MPs E1).

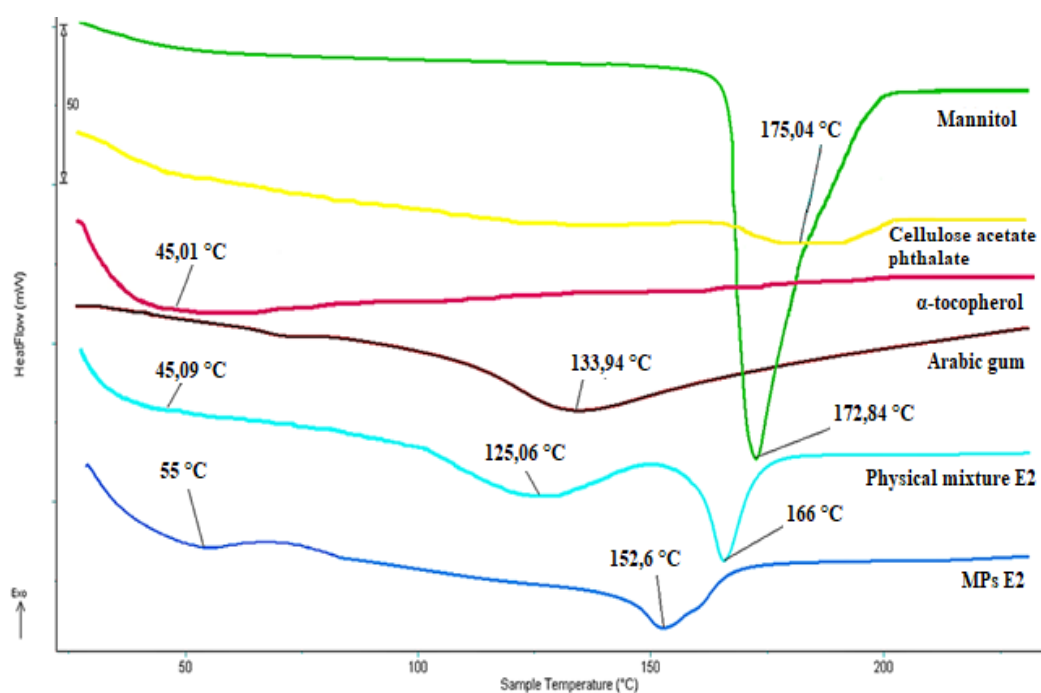

**Figure S19.** Comparison between the DSC graphs of mannitol, CAP,  $\alpha$ -tocopherol, the physical mixture of the compounds presents in the formulation E2 and microparticles (MPs E2).

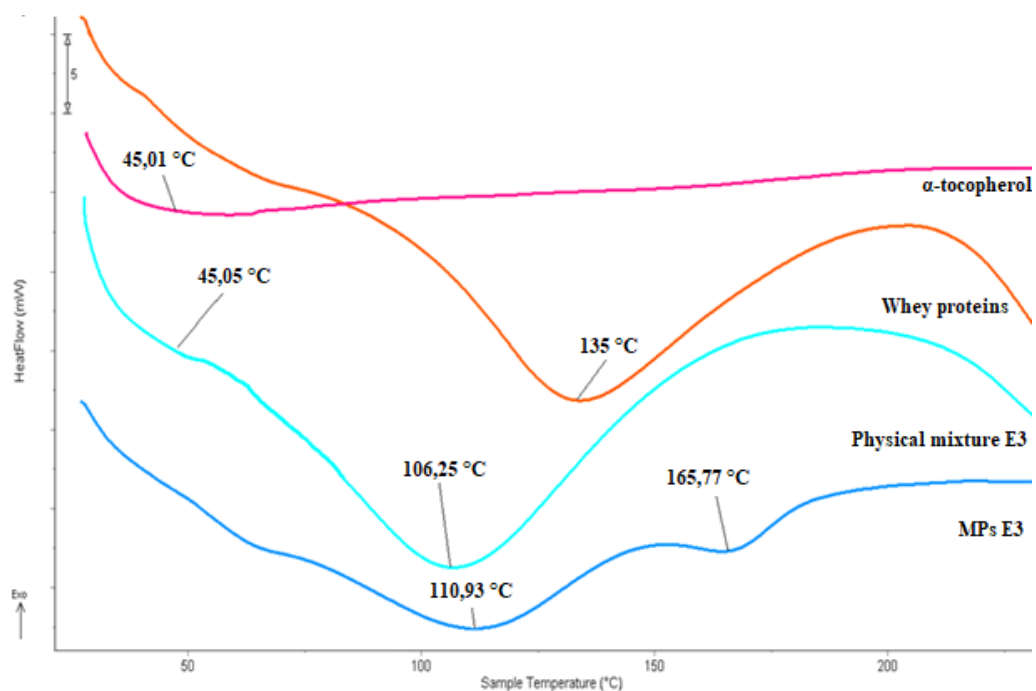

**Figure S20.** Comparison between the DSC graphs of WPs,  $\alpha$ -tocopherol, the physical mixture of the compounds presents in the formulation E3 and microparticles (MPs E3).
